# Supplementary material for: Viral RNA Metagenomics of Hyalomma Ticks Collected from Dromedary Camels in Makkah Province, Saudi Arabia
Source: MDPI journal article supplement (doi:10.3390/v13071396), 2021-07-18
Supplement: s1 [file s1]

Protein alignment [Matrix: "BLOSUM62" Gap penalty: 10 Gap extension penalty: 1]

| Sequence-1 | YP_009666940.1 | %Identity | %Similar | %Gaps | Identical | Similar | Count | Length | Score | Length |
|------------|----------------|-----------|----------|-------|-----------|---------|-------|--------|-------|--------|
| 7>249      | 3>245          | 93.0%     | 97.9%    | 0.0%  | 226       | 238     | 0     | 0      | 1,173 | 243    |

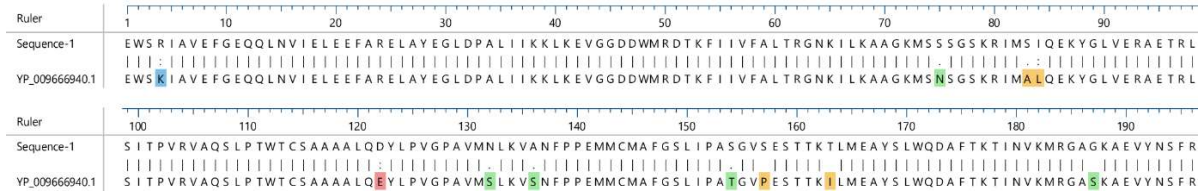

**Figure S1.** BLOSUM62 score showing substitutions between the newly identified Guertu virus in Saudi Arabia and the strain (YP\_009666940.1) identified in China.

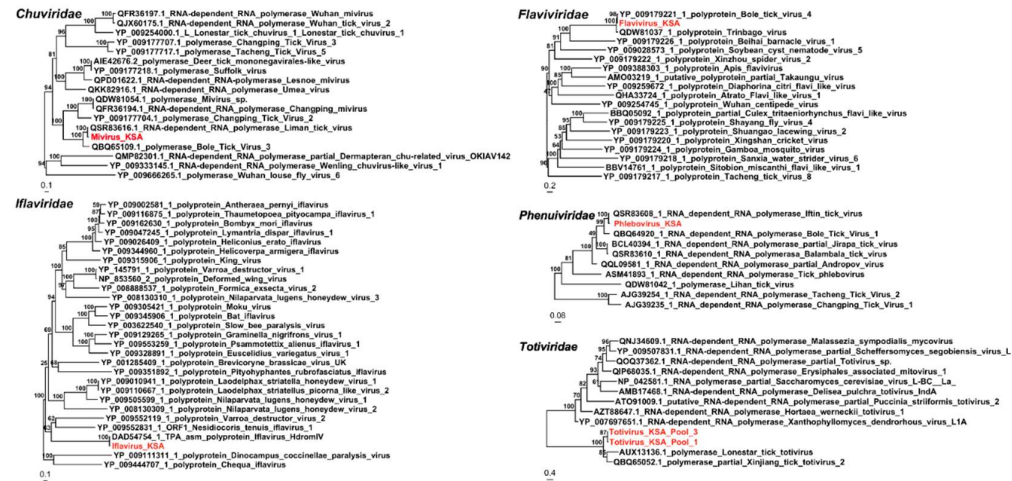

**Figure S2.** Phylogenetic trees of viruses that have not been associated with human diseases. The viruses detected in Saudi Arabia are marked with red colour.
